# Supplementary material for: Impact of the COVID-19 Pandemic on Pediatric Emergency Medicine: A Systematic Review
Source: MDPI journal article supplement (doi:10.3390/medicina58081112), 2022-08-17
Supplement: s1 [file s1]

## Newcastle-Ottawa Scale

| Frist Author (year)       | Selection<br>* * * * * | Comparability<br>* * | Outcome<br>* * * |
|---------------------------|------------------------|----------------------|------------------|
| Amidei (2021)             | * * *                  | *                    | * *              |
| Atti (2020)               | * * * *                | *                    | * * *            |
| Brisca (2021)             | *                      | *                    | * *              |
| Chong (2020)              | * * * *                | *                    | * * *            |
| DeLaroche (2021)          | * * * *                | *                    | * * *            |
| Dopfer (2020)             | * * *                  | *                    | * * *            |
| Erlichman (2021)          | * * * *                | *                    | * * *            |
| Finkelstein (2021)        | * * * *                | *                    | * * *            |
| Goldman (2020)            | * * * *                | *                    | * * *            |
| Isba (2020)               | * * *                  | *                    | * * *            |
| Jang (2021)               | * * * *                | *                    | * * *            |
| Kruizinga (2021)          | * * *                  | *                    | * *              |
| Lee (2021)                | * * * *                | *                    | * * *            |
| Liguoro (2021)            | * * * *                | *                    | * * *            |
| Matera (2020)             | * * * *                | *                    | * * *            |
| Matera (2021)             | * * * *                | *                    | * * *            |
| Pepper (2021)             | * * *                  | *                    | * *              |
| Pines (2021)              | * * *                  | *                    | * *              |
| Ramgopal (2021)           | * * * *                | *                    | * * *            |
| Raucci (2021)             | * * * *                | *                    | * * *            |
| Shanmugavadivel<br>(2021) | * * * *                | *                    | * * *            |
| Shichijo (2021)           | * * * *                | *                    | * *              |
| Silvagni (2021)           | * * * *                | *                    | * * *            |
| Sokoloff (2021)           | * * * *                | *                    | * * *            |
| Yamamoto (2021)           | * *                    | *                    | * *              |
